# Supplementary material for: Maternal Lipidomic Signatures in Relation to Spontaneous Preterm Birth and Large-For-Gestational Age Neonates
Source: Research Square preprint supplement (doi:10.21203/rs.3.rs-138617/v1), 2021-01-05

**Title:** Maternal lipidomic signatures in relation to spontaneous preterm birth and large-for-gestational age neonates

**Authors:** Max T. Aung<sup>1</sup>, Pahriya Ashrap<sup>2</sup>, Deborah J. Watkins<sup>2</sup>, Bhramar Mukherjee<sup>1,3</sup>, Zaira Rosario<sup>4</sup>, Carmen M. Vélez-Vega<sup>4</sup>, Akram N. Alshawabkeh<sup>5</sup>, José F. Cordero<sup>6</sup>, John D. Meeker<sup>2\*</sup>

**Affiliations:**

<sup>1</sup>Department of Biostatistics, University of Michigan, School of Public Health, Ann Arbor, MI

<sup>2</sup>Department of Environmental Health Sciences, University of Michigan, School of Public Health, Ann Arbor, MI

<sup>3</sup>Department of Epidemiology, University of Michigan, School of Public Health, Ann Arbor, MI

<sup>4</sup>University of Puerto Rico Graduate School of Public Health, UPR Medical Sciences Campus, San Juan, Puerto Rico

<sup>5</sup>College of Engineering, Northeastern University, Boston, MA

<sup>6</sup>Department of Epidemiology and Biostatistics, University of Georgia, Athens, GA

**Supplementary Figures**

**Supplemental Figure 1.** Sparse-group lasso on whole lipid classes for overall preterm birth. The dashed vertical lines indicate the value of  $\log(\lambda)$  corresponding to the first time the whole lipid class was excluded from the model as  $\log(\lambda)$  increases. The numbers 1 through 20 indicate the following: (1) covariates; (2) free fatty acids; (3) fatty acid esters of hydroxy fatty acids; (4) cholesterol esters; (5) acylcarnitines; (6) ceramides; (7) glucosylceramides; (8) sphingomyelins; (9) diglycerides; (10) lysophosphatidylcholines; (11) lysophosphatidylethanolamines; (12) phosphatidic acids; (13) phosphatidylcholines; (14) phosphatidylethanolamines; (15) phosphatidylserines; (16) plasmeyl-phosphatidylcholines; (17) plasmeyl-phosphatidylethanolamines; (18) phosphatidylglycerols; (19) phosphatidylinositols; (20) triglycerides.

### Overall Preterm Birth

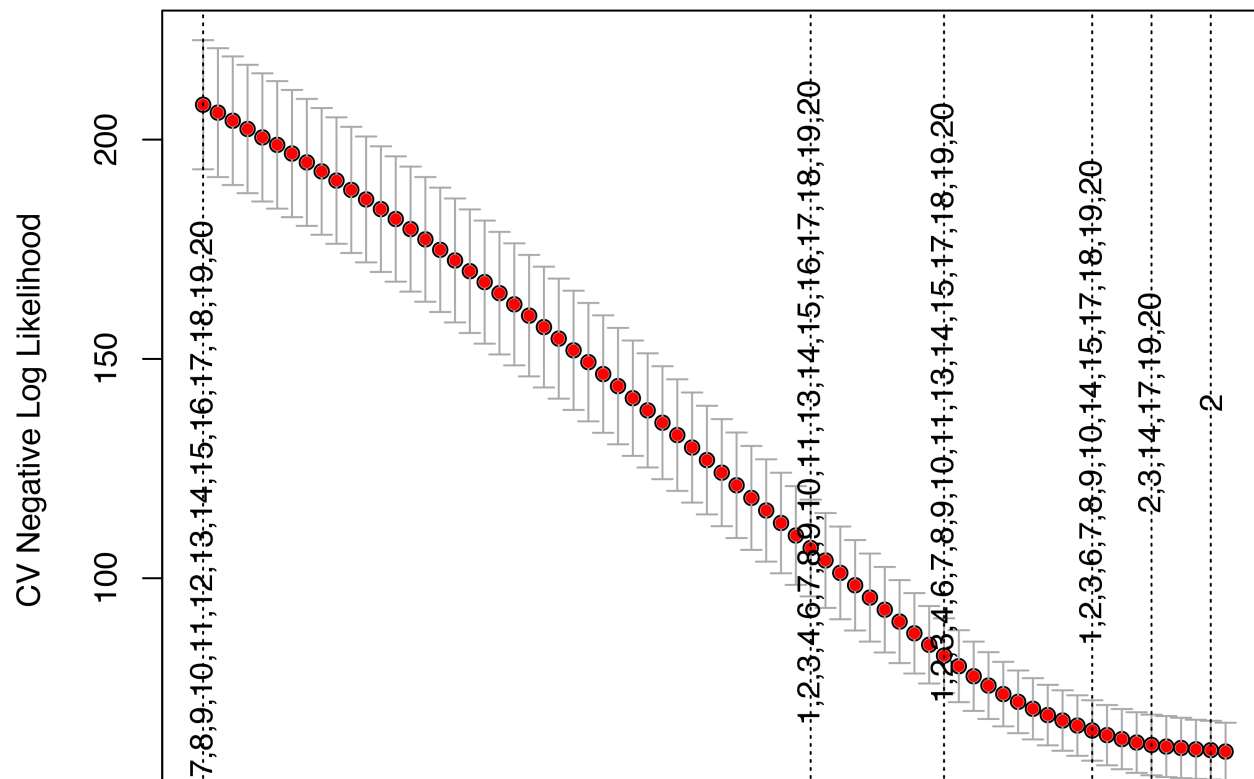

**Supplemental Figure 2.** Sparse-group lasso on whole lipid classes for spontaneous preterm birth. The dashed vertical lines indicate the value of  $\log(\lambda)$  corresponding to the first time the whole lipid class was excluded from the model as  $\log(\lambda)$  increases. The numbers 1 through 20 indicate the following: (1) covariates; (2) free fatty acids; (3) fatty acid esters of hydroxy fatty acids; (4) cholesterol esters; (5) acylcarnitines; (6) ceramides; (7) glucosylceramides; (8) sphingomyelins; (9) diglycerides; (10) lysophosphatidylcholines; (11) lysophosphatidylethanolamines; (12) phosphatidic acids; (13) phosphatidylcholines; (14) phosphatidylethanolamines; (15) phosphatidylserines; (16) plasmeyl-phosphatidylcholines; (17) plasmeyl-phosphatidylethanolamines; (18) phosphatidylglycerols; (19) phosphatidylinositols; (20) triglycerides.

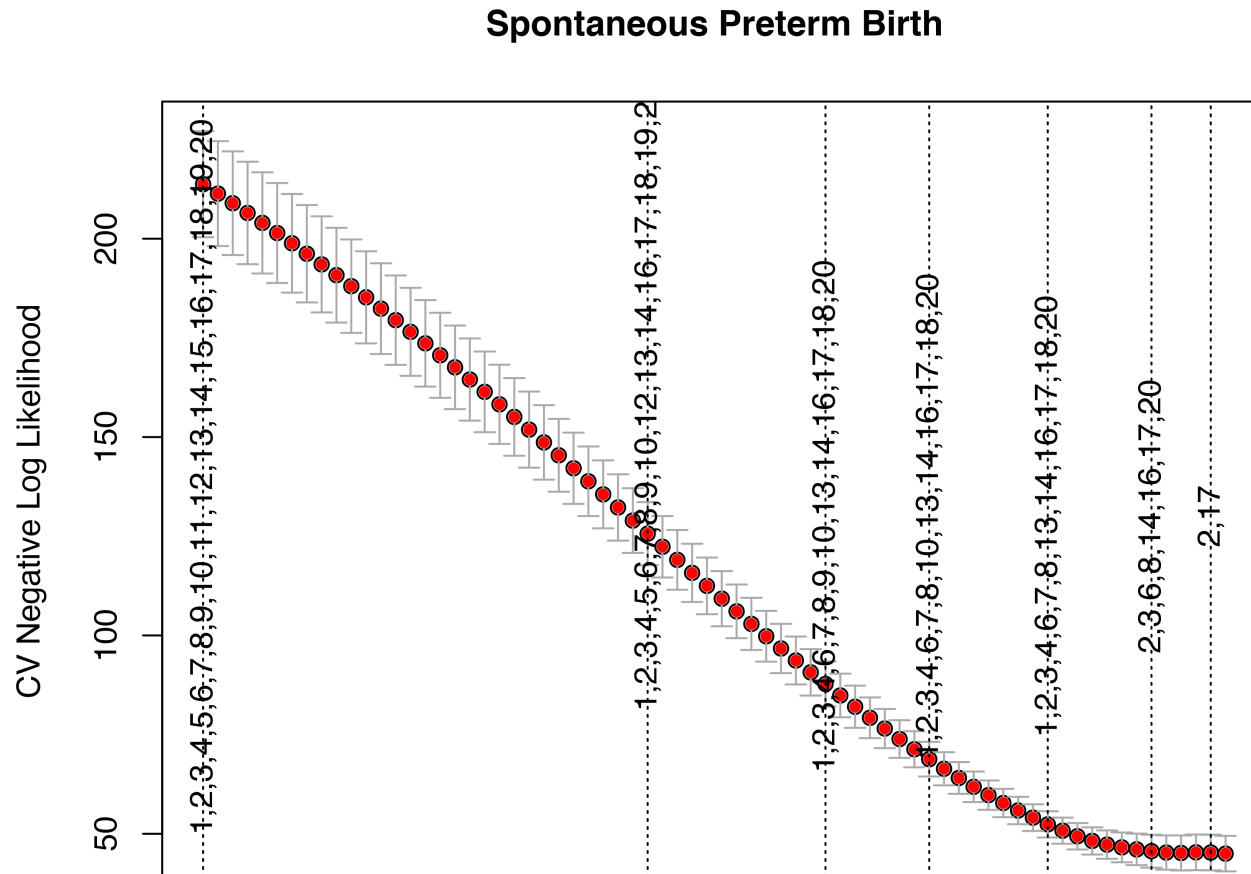

**Supplemental Figure 3.** Sparse-group lasso on whole lipid classes for large for gestational age neonates. The dashed vertical lines indicate the value of  $\log(\lambda)$  corresponding to the first time the whole lipid class was excluded from the model as  $\log(\lambda)$  increases. The numbers 1 through 20 indicate the following: (1) covariates; (2) free fatty acids; (3) fatty acid esters of hydroxy fatty acids; (4) cholesterol esters; (5) acylcarnitines; (6) ceramides; (7) glucosylceramides; (8) sphingomyelins; (9) diglycerides; (10) lysophosphatidylcholines; (11) lysophosphatidylethanolamines; (12) phosphatidic acids; (13) phosphatidylcholines; (14) phosphatidylethanolamines; (15) phosphatidylserines; (16) plasmeyl-phosphatidylcholines; (17) plasmeyl-phosphatidylethanolamines; (18) phosphatidylglycerols; (19) phosphatidylinositols; (20) triglycerides.

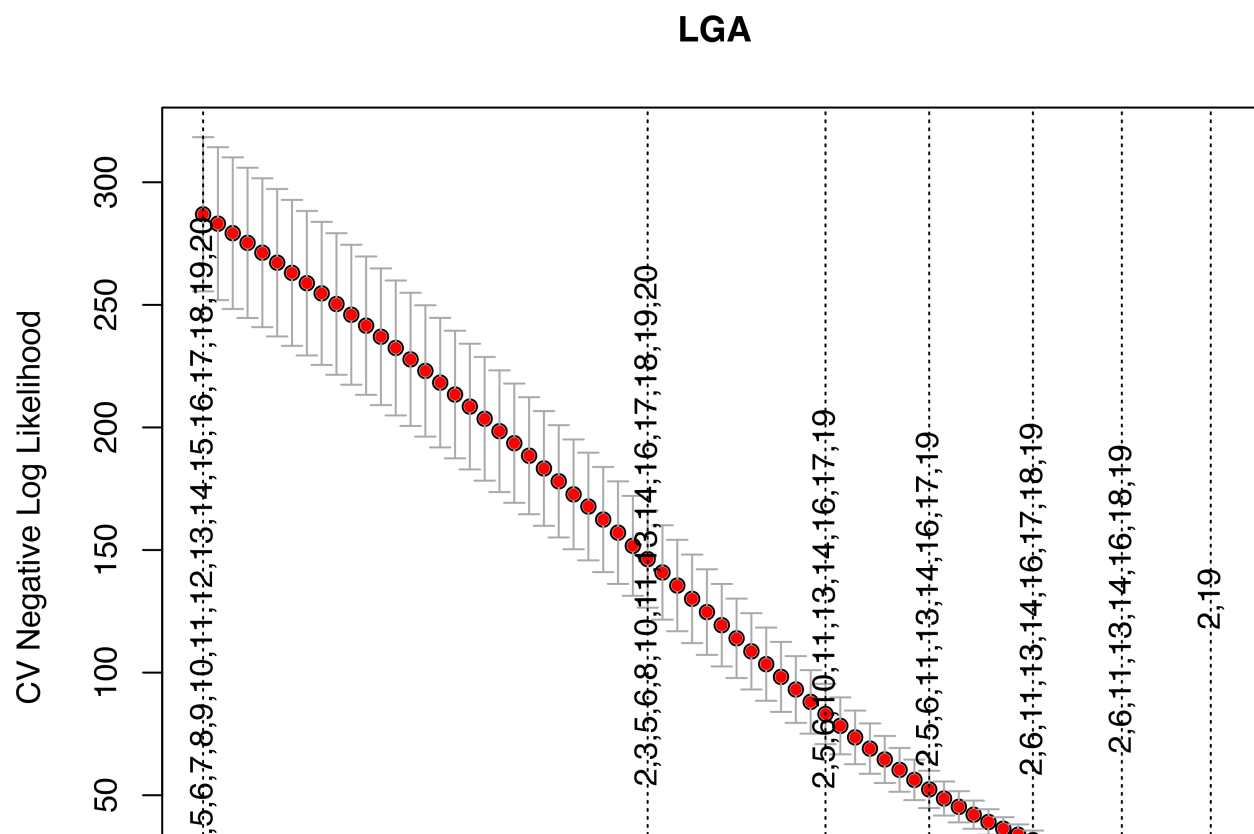

Supplement: Supplementary file 1 [file f11f92b053154d860d5b460e.pdf]
